# Supplementary material for: Low-dose simvastatin protects pancreatic cancer cells by promoting mitochondrial autophagy through TFEB
Source: Research Square preprint supplement (doi:10.21203/rs.3.rs-7657011/v1), 2025-10-09
Supplement: Supplementary file 1 [file f7e96ee3f37bc68273b77ac0.docx]

**Figure S1: Simvastatin reduces Erastin-induced cell apoptosis.**

(A): The levels of apoptosis in PANC-1 and SW1990 cells were detected using Annexin V-FITC, propidium iodide (PI) staining, and flow cytometry.

All quantified data are shown as mean ± SEM; *p < 0.05, **p < 0.01, ***p < 0.001 by one-way ANOVA followed by the Tukey-Kramer test.
